# Supplementary material for: Gene selection for optimal prediction of cell position in tissues from single-cell transcriptomics data
Source: Life Sci Alliance. 2020 Sep 25;3(11):e202000867. doi: 10.26508/lsa.202000867 (PMC7536825; doi:10.26508/lsa.202000867)
Supplement: Supplementary file 1 [file LSA-2020-00867_TableS1.xlsx]

## Sheet: Subchallenge 1Subchallenge 2 Su
Table S1: Best mean score for metrics s1, s2 and s3 achieved by the top performing teams per Drosophila subchallenge. The columns marked sd denote the standard deviation of scores across folds for the corresponding score.
	Subchallenge 1						Subchallenge 2						Subchallenge 3
Team	s1	sd	s2	sd	s3	sd	s1	sd	s2	sd	s3	sd	s1	sd	s2	sd	s3	sd
BCBU	0.644	0.034	1.16	0.092	0.595	0.012	0.619	0.038	1.124	0.119	0.609	0.015	0.633	0.044	1.098	0.106	0.653	0.02
Challengers18	0.661	0.039	1.456	0.115	0.602	0.01	0.634	0.046	1.279	0.126	0.666	0.015	0.637	0.049	0.994	0.087	0.78	0.022
ChristophHafemeister	0.674	0.04	1.054	0.062	0.657	0.015	0.664	0.043	0.991	0.076	0.698	0.01	0.611	0.046	0.899	0.074	0.637	0.017
DeepCMC	0.653	0.028	0.94	0.079	0.631	0.018	0.645	0.044	0.922	0.082	0.688	0.021	0.65	0.024	0.839	0.066	0.804	0.046
MLB	0.617	0.029	0.872	0.085	0.576	0.024	0.601	0.043	0.772	0.143	0.626	0.015	0.577	0.047	0.695	0.109	0.665	0.015
NAD	0.64	0.041	1.074	0.132	0.606	0.012	0.644	0.04	1.034	0.125	0.674	0.01	0.631	0.03	0.921	0.118	0.791	0.011
OmicsEngineering	0.68	0.04	1.034	0.068	0.633	0.009	0.656	0.039	0.982	0.085	0.696	0.013	0.654	0.047	0.877	0.128	0.787	0.024
Thin Nguyen	0.762	0.045	2.525	0.28	0.594	0.012	0.692	0.044	1.697	0.306	0.623	0.013	0.642	0.055	1.046	0.135	0.717	0.011
WhatATeam	0.701	0.034	1.535	0.176	0.636	0.012	0.686	0.03	1.164	0.119	0.673	0.017	0.648	0.054	0.932	0.152	0.788	0.017
Zho	0.757	0.048	2.518	0.392	0.573	0.011	0.657	0.03	1.571	0.136	0.558	0.008	0.538	0.029	0.897	0.059	0.466	0.022
