# Supplementary material for: Gene selection for optimal prediction of cell position in tissues from single-cell transcriptomics data
Source: Life Sci Alliance. 2020 Sep 25;3(11):e202000867. doi: 10.26508/lsa.202000867 (PMC7536825; doi:10.26508/lsa.202000867)
Supplement: Supplementary file 3 [file LSA-2020-00867_TableS3.xlsx]

## Sheet: Sheet1
Table S3: Summary of methods used by the top 10 teams for gene selection and location prediction. Some teams used different approaches or a combination of approaches for different subchallenges. As in Table S2, the methods used for gene selection are categorized in four different categories: SFR - Supervised feature ranking, UFR - unsupervised feature ranking, KNW - background knowledge, and VAR …
			Selection
		SFR	UFR	KNW	VAR
	CMB	2	1	2
Prediction	MCC	3	2		1
	SIM		5
