# Supplementary material for: Gene selection for optimal prediction of cell position in tissues from single-cell transcriptomics data
Source: Life Sci Alliance. 2020 Sep 25;3(11):e202000867. doi: 10.26508/lsa.202000867 (PMC7536825; doi:10.26508/lsa.202000867)
Supplement: Supplementary file 8 [file LSA-2020-00867_TableS7.xlsx]

## Sheet: Sheet1
Subchallenge 1	aay ama ance antp apt blimp-1 brk btk29A bun cg10479 cg14427 cg43394 cg8147 croc cyp310a1 d dan danr dfd disco doc2 doc3 dpn E(spl)m5-HLH edl eve fj fkh ftz gt h hb htl ilp4 impE2 impL2 kni knrl kr lok mdr49 mes2 mESR3 noc nub oc odd prd rau rho run sna srp tkv toc traf4 trn tsh twi zen zfh1
Subchallenge 2	aay ama ance antp blimp-1 brk btk29A cg43394 cg8147 croc cyp310a1 d dan disco doc3 dpn edl fj fkh ftz gt h ilp4 impE2 impL2 kni knrl kr mes2 mESR3 noc nub oc rho run sna srp tsh twi zfh1
Subchallenge 3	ama antp brk cg8147 cyp310a1 disco doc2 doc3 fkh h ilp4 impE2 kni knrl mes2 nub oc sna tsh twi
Table S7: Most frequently selected 60, 40 and 20 genes in Drosophila subchallenges 1,2 and 3 respectively, in alphabetical order, colored according to Figure S17. That is yellow are gap genes and green are pair-rule genes.
